# Supplementary material
Source: PubMed Central journal article supplement (PMC4137348)
Supplement: Supp_Fig1.pdf [file Supp_Fig1.pdf]

## Supplementary Data

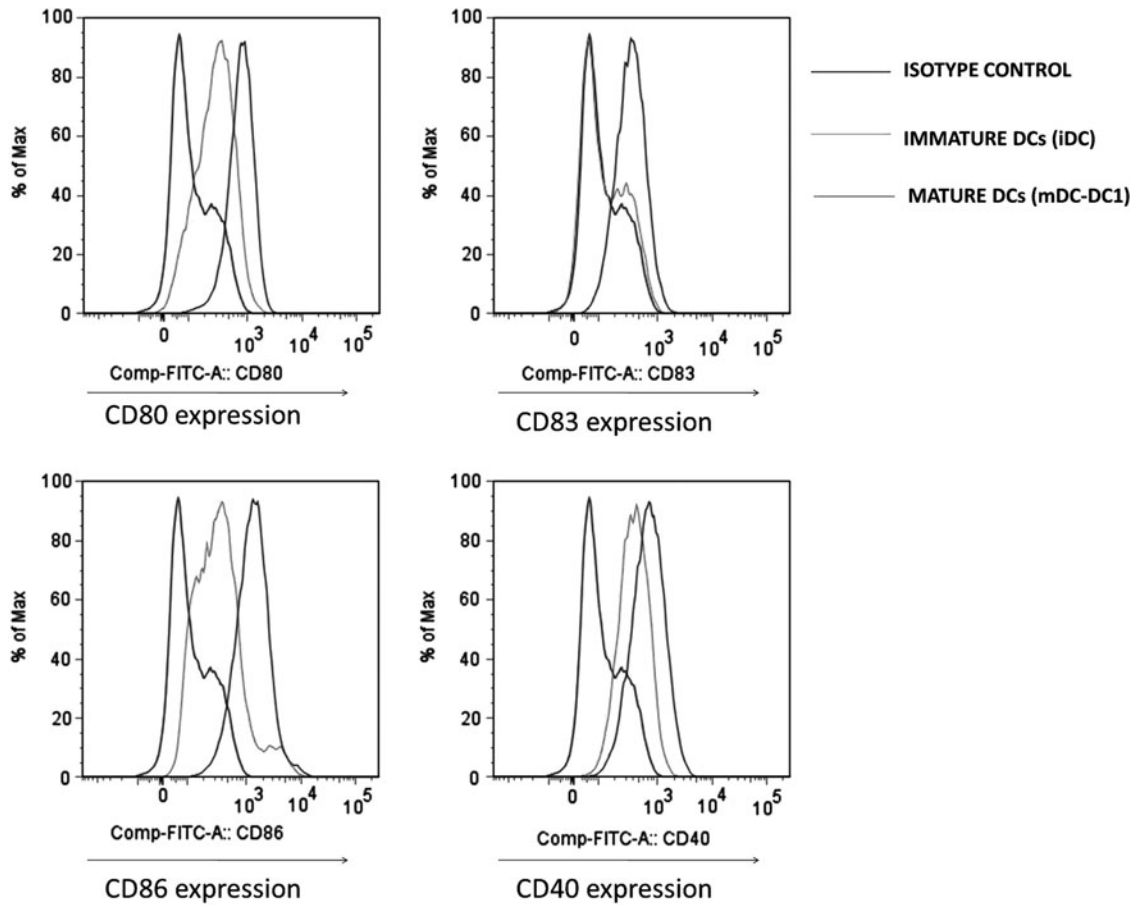

**SUPPLEMENTARY FIG. S1.** Polarized DC1 cells exhibit characteristics of mature dendritic cells (mDCs). Peripheral blood monocytes were differentiated to immature dendritic cells (iDCs) upon culture in complete medium in the presence of granulocyte-macrophage colony stimulating factor and interleukin-4 for 4 days. Mature dendritic cells (mDCs) were obtained upon stimulation of iDCs with IFN- $\gamma$  and lipopolysaccharide (LPS). mDCs were harvested and assayed for their expression of CD80, CD86, CD83, and CD40 via flow cytometry analysis using specific antibodies. mDCs demonstrated high levels of expression of CD80, CD83, CD86, and CD40.
