# Supplementary material
Source: PubMed Central journal article supplement (PMC4137348)
Supplement: Supp_Fig2.pdf [file Supp_Fig2.pdf]

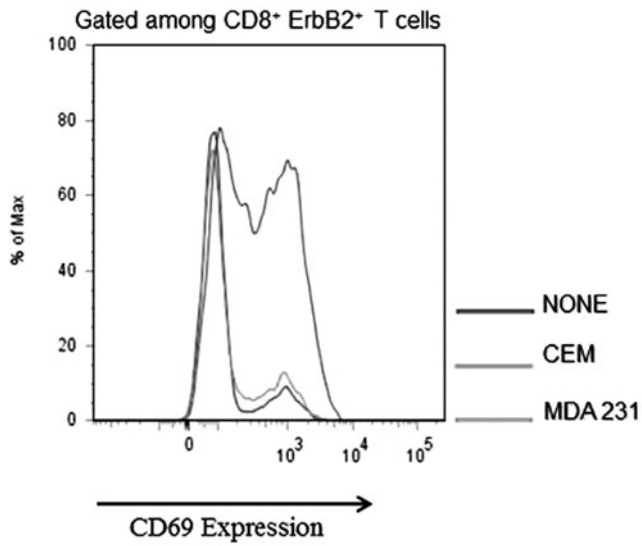

**SUPPLEMENTARY FIG. S2.** ErbB2-expressing cancer cells stimulate an activated phenotype of ErbB2-specific T cells. ErbB2-specific T cells express the CD69 early activation antigen in response to ErbB2-specific stimulation. ErbB2-specific T cells were cultured without target cells (none) or with the indicated ErbB2-negative or ErbB2-positive established tumor cell targets for 24 hr. After the incubation period, the T cells were stained for CD8, ErbB2 tetramer, and CD69 and analyzed by flow cytometry. CD8<sup>+</sup> ErbB2 tetramer<sup>+</sup> CD69<sup>+</sup> T cells were then sorted using fluorescence-activated flow sorting.
